# Supplementary material for: Graphene oxide–iron complex: synthesis, characterization and visible-light-driven photocatalysis
Source: Royal Society of Chemistry journal article supplement (doi:10.1039/c2ta00371f), 2012-10-18
Supplement: c2ta00371f.pdf [file c2ta00371f.pdf]

## Supporting Information

### **Graphene oxide-iron complex: synthesis, characterization and visible-light-driven photocatalysis**

Ying Dong,<sup>ac</sup> Jing Li,<sup>\*a</sup> Lei Shi,<sup>a</sup> Jun Xu,<sup>ac</sup> Xiaobo Wang,<sup>a</sup> Zhiguang Guo<sup>\*ab</sup> and Weimin Liu<sup>a</sup>

<sup>a</sup> State Key Laboratory of Solid Lubrication, Lanzhou Institute of Chemical Physics, Chinese Academy of Sciences, Lanzhou 730000, People's Republic of China. E-mail: zguo@licp.cas.cn; jli@licp.cas.cn.

<sup>b</sup> Ministry of Education Key Laboratory for the Green Preparation and Application of Functional Materials, Hubei University, Wuhan 430062, People's Republic of China.

<sup>c</sup> Graduate School of Chinese Academy of Sciences, Beijing 100049, People's Republic of China.

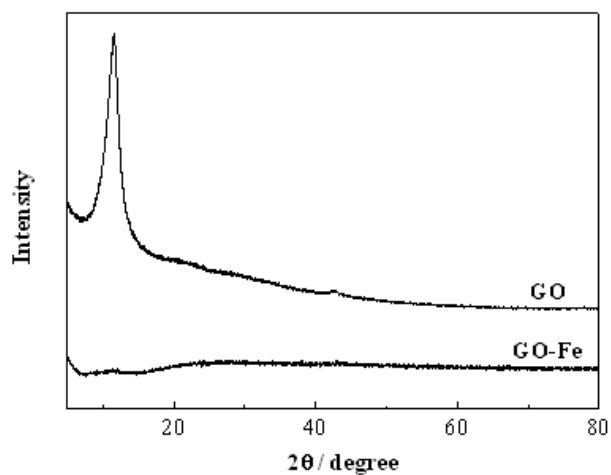

**Fig. S1** XRD patterns of GO and GO-Fe.

**Table S1** Atomic concentration from XPS and TGA.

|     | C      | O      | Fe    | C/Fe |
|-----|--------|--------|-------|------|
| XPS | 69.83% | 28.87% | 1.30% | 54   |
| TGA | 69.27% | 28.63% | 2.10% | 33   |

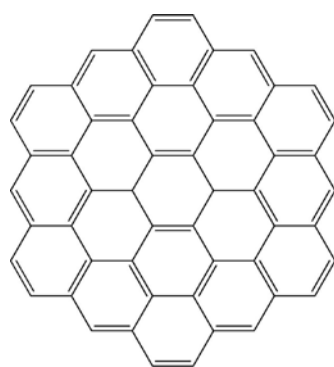

**54C/1Fe (XPS)**

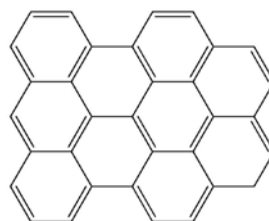

**33C/1Fe (TGA)**

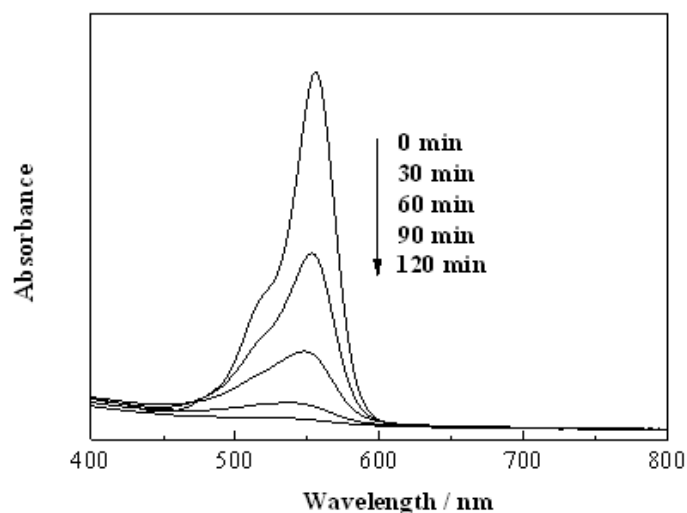

**Fig. S2** UV-visible absorption spectra change of RhB as a function of irradiation time with visible light. The initial concentrations of the reaction solution: RhB (10  $\mu\text{M}$ ), GO-Fe (5 mg/L), and  $\text{H}_2\text{O}_2$  (2 mM). pH = 3.

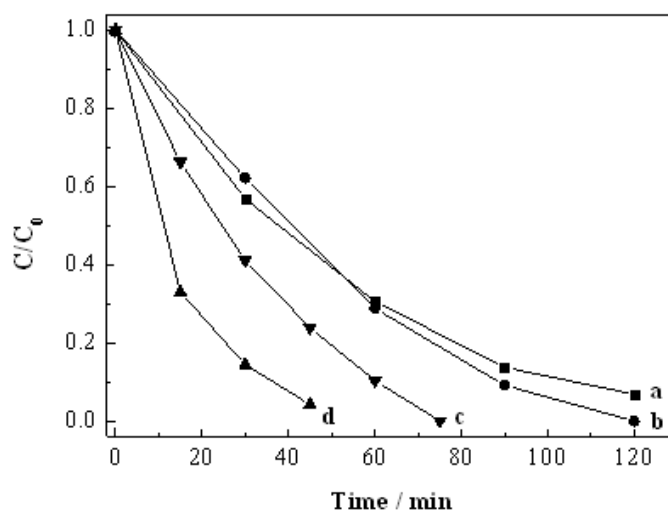

**Fig. S3** Concentration changes of organic compounds as a function of reaction time. 5 mg/L GO-Fe, 2 mM  $\text{H}_2\text{O}_2$  under visible-light irradiation, pH = 3: (a) 20  $\mu\text{M}$  Crystal Violet, (b) 10  $\mu\text{M}$  Malachite Green, (c) 40  $\mu\text{M}$  Orange II, (d) 20  $\mu\text{M}$  Methylene Blue.

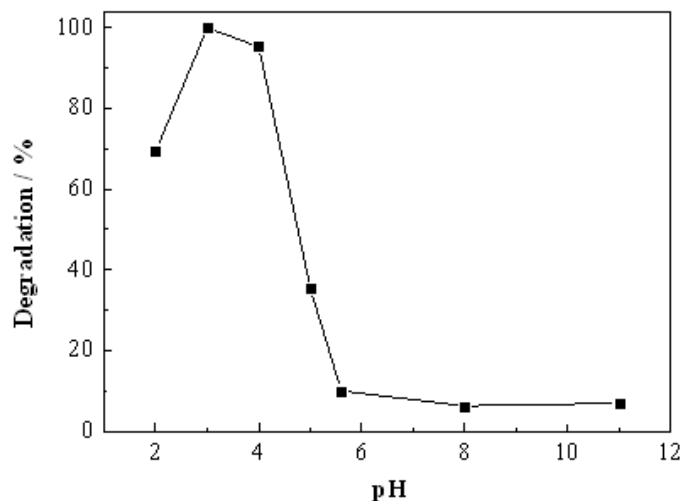

**Fig. S4** Effect of pH on the photodegradation of RhB (10  $\mu$ M) within 2 h of visible-light irradiation containing GO-Fe (5 mg/L) and H<sub>2</sub>O<sub>2</sub> (2 mM).

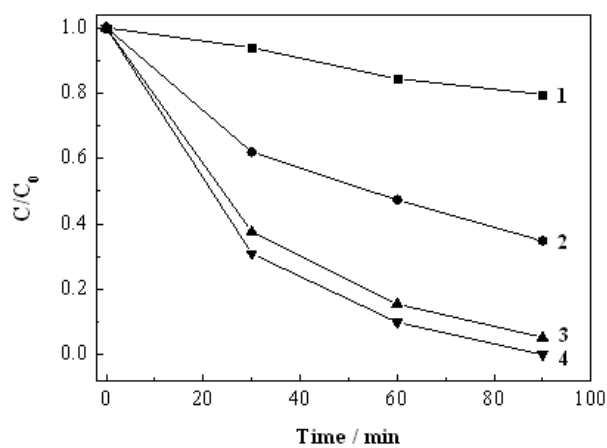

**Fig. S5** Effect of adding fluoride ions (F<sup>-</sup>) at different concentration to the reaction system containing RhB (10  $\mu$ M), GO-Fe (10 mg/L), and H<sub>2</sub>O<sub>2</sub> (2 mM) on the degradation rate of RhB. The initial concentration of KF: (1)  $5 \times 10^{-3}$  M, (2)  $5 \times 10^{-4}$  M, (3)  $5 \times 10^{-5}$  M, and (4) no KF. pH = 3.

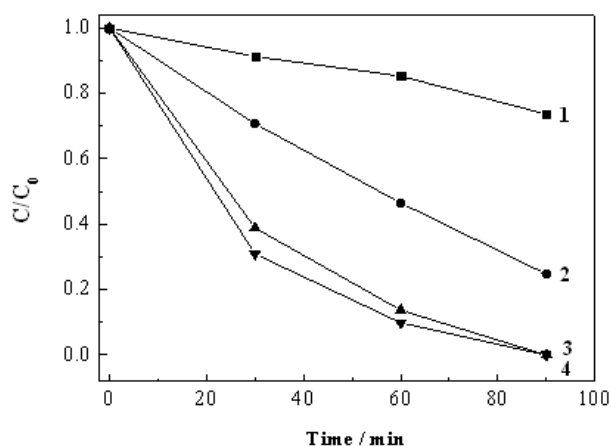

**Fig. S6** Effect of adding isopropanol at different concentration to the reaction system containing RhB (10  $\mu$ M), GO-Fe (10 mg/L), and H<sub>2</sub>O<sub>2</sub> (2 mM) on the degradation rate of RhB. The initial concentration of isopropanol: (1)  $5 \times 10^{-3}$  M, (2)  $5 \times 10^{-4}$  M, (3)  $5 \times 10^{-5}$  M, and (4) no isopropanol. pH = 3.

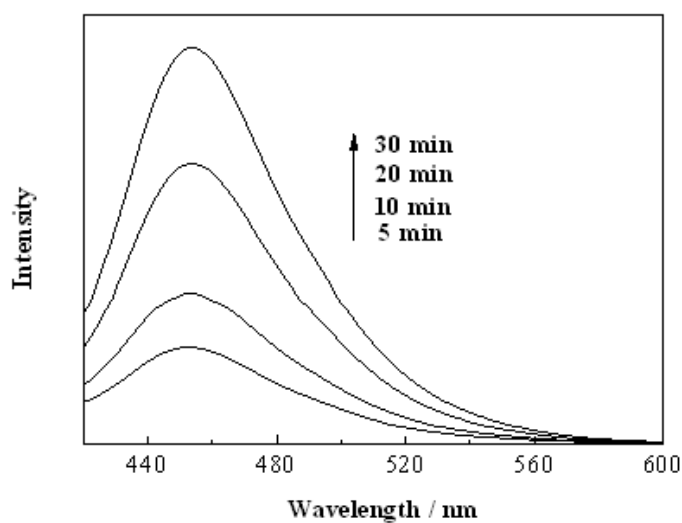

**Fig. S7** Fluorescence spectra change of coumarin (0.5 mM, pH 3) as a function of irradiation time with visible light. Excitation wavelength is 345 nm.

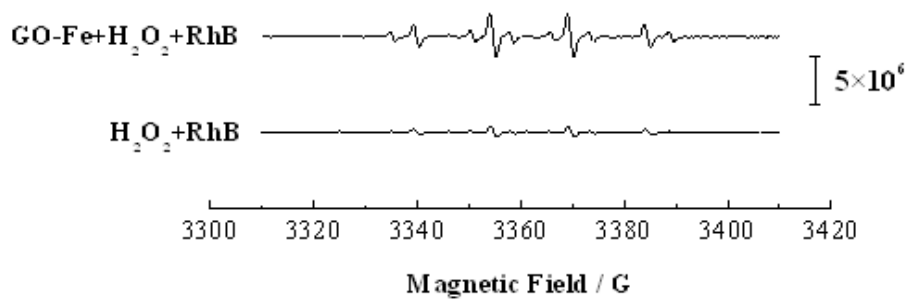

**Fig. S8** DMPO spin-trapping ESR signals for GO-Fe+H<sub>2</sub>O<sub>2</sub>+RhB and H<sub>2</sub>O<sub>2</sub>+RhB systems. [GO-Fe] = 10 mg/L; [H<sub>2</sub>O<sub>2</sub>] = 2 mM; [RhB] = 10 μM; pH = 3.
